# Supplementary material for: Phosphorene as a promising anchoring material for lithium–sulfur batteries: a computational study
Source: Royal Society of Chemistry journal article supplement (doi:10.1039/c6ta00871b), 2016-01-01
Supplement: c6ta00871b1.pdf [file c6ta00871b1.pdf]

## Supporting Information

### **Phosphorene as a Promising Anchoring Material for Lithium-Sulfur Batteries: A Computational Study**

Jingxiang Zhao,<sup>†,‡</sup> Yongan Yang,<sup>‡</sup> Ram S Katiyar,<sup>#</sup> Zhongfang Chen<sup>‡,\*</sup>

<sup>†</sup> *College of Chemistry and Chemical Engineering, Harbin Normal University, Harbin 150025, China*

<sup>‡</sup> *Department of Chemistry, Institute of Functional Nanomaterials, University of Puerto Rico, Rio Piedras Campus, San Juan, PR 00931, USA*

<sup>‡</sup> *Department of Chemistry and Geochemistry, Colorado School of Mines, Golden, CO 80401, USA*

<sup>#</sup> *Department of Physics, Institute of Functional Nanomaterials, University of Puerto Rico, Rio Piedras Campus, San Juan, PR 00931, USA*

\* To whom correspondence should be addressed. Email: zhongfangchen@gmail.com

(ZC)

Figure S1

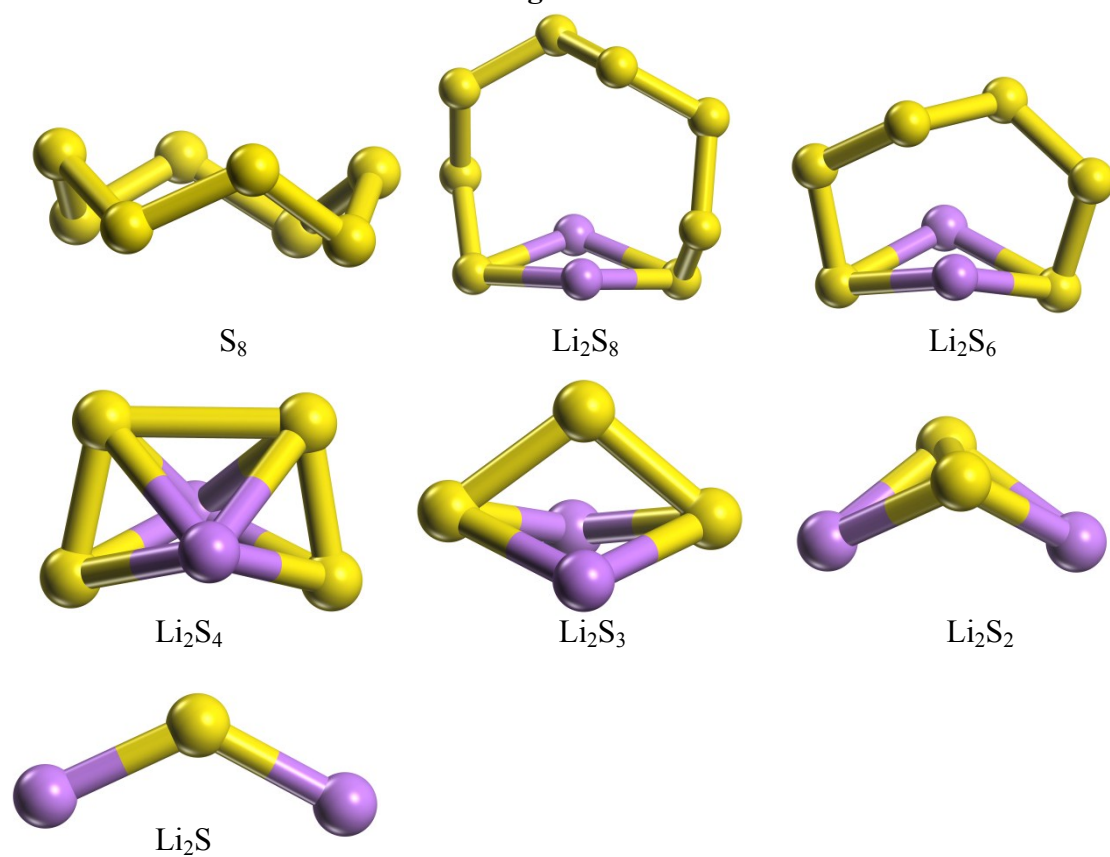

Fig. S1. The optimized structures of various  $\text{Li}_2\text{S}_x$  species.

**Figure S2**

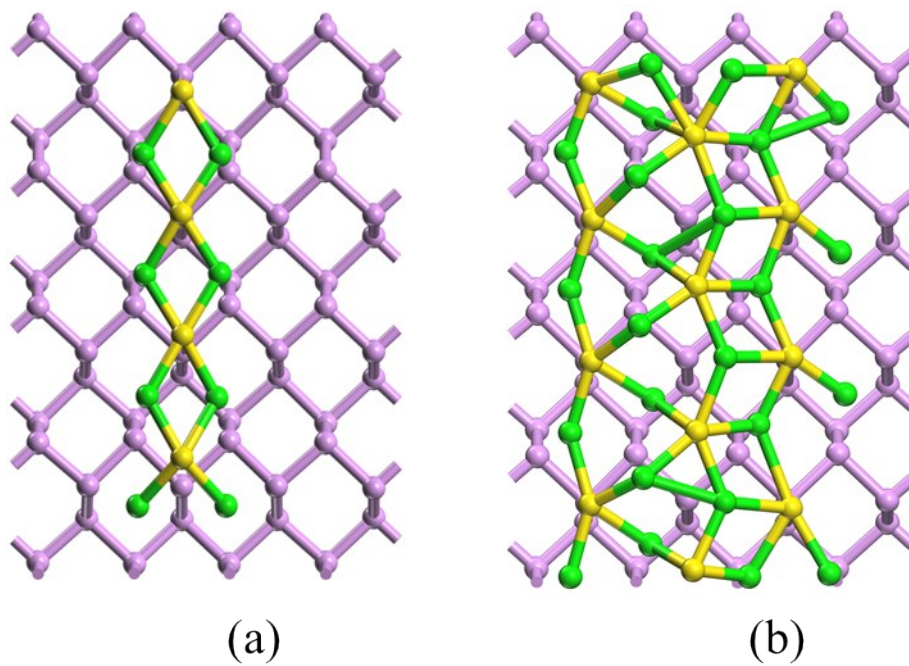

**Figure S2.** The most stable configurations of (a)  $(\text{Li}_2\text{S})_4$  and (b)  $(\text{Li}_2\text{S})_{\text{full-coverage}}$  clusters adsorbed on phosphorene surface.
